# Supplementary material for: A novel network security situation assessment model based on multiple strategies whale optimization algorithm and bidirectional GRU
Source: PeerJ journal article supplement (doi:10.7717/peerj-cs.1729), 2023-12-12
Supplement: code1.zip [file indexdata_havebuginformation_total_2.xls]

## Sheet: Sheet1
a
0.250594	15	32	0.0192308	1	2.22614	0.175	0.490107
0.156538	14	60	0.252747	1	1.06055	18.4125	0.496369
0.173899	21	45	0.309524	1	0.0896134	12.37	0.557717
0.250594	5	21	0.142857	1	0.0264169	0.2625	-0.000547644
0	0	18	0	1	0.785326	0	0.000114212
0	0	10	0	1	1	0	0.000814137
0	0	10	0	1	1.27336	0	0.000900195
0	0	18	0	1	0.785326	0	-0.00257387
0	0	10	0	1	1	0	-0.00158471
0	0	10	0	1	1.0173	0	0.00344973
0	0	15	0	1	26.3946	0	0.00267604
0	0	15	0	1	0.0277062	0	-0.00364811
0	0	8	0	1	1.36744	0	0.0142441
0	0	15	0	1	13225.4	0	0.461816
0.198286	86	72	0.0633609	1	2.08771	3.72	0.492828
0.182294	425	76	0.0221256	1	1.48954	9.9625	0.535694
0.197086	383	100	0.0314702	1	1.2851	11.9285	0.576771
0.184812	441	80	0.0529032	1	0.925252	21.896	0.539385
0.161399	438	80	0.0882768	1	1.14876	23.5305	0.396889
0.13394	391	100	0.0789474	1	0.938222	11.0495	0.465387
0.168954	393	80	0.0532633	1	1.0125	10.33	0.339243
0.111461	376	76	0.101818	1	0.977068	9.174	0.362583
0.122289	362	100	0.0825036	1	1.31397	9.9575	0.374169
0.123453	377	80	0.0968179	1	0.511538	10.8145	0.464063
0.140808	324	76	0.0871272	1	1.01196	19.351	0.454704
0.187802	237	100	0.047619	1	1.60636	4.3215	0.655459
0.184904	427	95	0.0828267	1	1.13093	33.396	0.417745
0.140469	432	100	0.0857947	1	1.11172	11.336	0.563157
0.169493	447	100	0.0728775	1	0.875833	23.9635	0.50001
0.181732	424	100	0.0455861	1	0.718452	11.32	0.50505
0.186357	445	76	0.0493827	1	1.30098	10.3465	0.482915
0.174838	513	126	0.0458302	1	1.07199	9.8625	0.511168
0.188821	474	76	0.0471092	1	0.663025	10.367	0.496302
0.182089	487	76	0.0451128	1	1.55094	10.143	0.458212
0.167884	453	100	0.0409894	1	0.912833	9.4125	0.441018
0.151605	496	76	0.0647687	1	0.906475	11.0705	0.495954
0.181398	462	76	0.0440154	1	0.899115	10.633	0.43875
0.14913	494	100	0.0756602	1	1.37963	11.391	0.530044
0.194066	479	72	0.0523013	1	1.091	11.2295	0.501899
0.180439	571	76	0.0454228	1	1.07062	10.28	0.534062
0.192631	546	105	0.0455154	1	0.936864	11.835	0.523026
0.191456	518	80	0.0445902	1	1.007	10.793	0.428991
0.148378	558	76	0.0498241	1	1.07323	10.003	0.524052
0.186771	535	90	0.0454545	1	0.787866	12.005	0.511237
0.181143	498	76	0.0686096	1	0.952062	12.3385	0.601427
0.193659	429	76	0.0658683	1	1.33301	22.4215	0.445032
0.158599	404	100	0.0525304	1	0.929933	10.585	0.495999
0.179834	438	76	0.0440332	1	1.23338	11.2205	0.456547
0.158827	410	76	0.0529066	1	0.692992	12.4315	0.508467
0.157477	447	120	0.0512821	1	0.814991	20.071	0.553045
0.176018	446	176	0.0845443	1	1.44068	20.2765	0.556327
0.163423	465	580	0.29927	1	0.778875	20.3285	0.601613
0.16931	564	1953	0.571467	1	0.865376	18.3935	0.615054
0.172946	531	300	0.627398	1	1.28962	19.851	0.622765
0.22912	492	80	0.222613	1	1.01009	10.688	0.659107
0.240031	522	105	0.227864	1	0.684385	12.0255	0.756479
0.246646	520	100	0.348866	1	1.37135	22.981	0.637173
0.237528	503	80	0.240226	1	0.916433	9.6475	0.608767
0.227603	503	105	0.191011	1	0.87445	9.477	0.634128
0.2316	505	84	0.268706	1	0.924924	10.452	0.668887
0.243104	572	84	0.206457	1	0.972867	12.6265	0.632919
0.231656	563	105	0.214768	1	1.0541	10.723	0.701333
0.23232	480	105	0.219727	1	1.69401	21.9385	0.700785
0.222767	508	100	0.212626	1	0.778535	24.409	0.59642
0.218735	504	105	0.187329	1	0.635401	10.5885	0.727204
0.203539	517	105	0.172414	1	1.23075	35.2785	0.572938
0.206704	550	80	0.149316	1	1.27431	11.1505	0.692359
0.220469	521	95	0.137588	1	0.812111	25.2715	0.589547
0.221699	462	80	0.182174	1	1.08633	9.2465	0.630772
0.23533	505	80	0.174441	1	1.32986	10.3675	0.616438
0.228922	496	110	0.249621	1	1.05804	9.2865	0.640551
0.238188	469	80	0.214121	1	0.782641	10.78	0.612722
0.225757	462	80	0.190263	1	1.03575	11.33	0.803299
0.240729	465	126	0.251826	1	0.861715	33.9445	0.646515
0.240922	451	80	0.271823	1	1.452	10.082	0.618243
0.225231	466	80	0.213175	1	0.991099	11.537	0.652643
0.243102	443	105	0.260819	1	0.963011	10.5515	0.598033
0.225826	432	84	0.222222	1	0.885349	8.446	0.704945
0.235215	509	110	0.254296	1	1.00825	20.48	0.684729
0.247542	485	105	0.256885	1	1.26195	13.4	0.650934
0.230178	504	80	0.24933	1	0.631777	14.13	0.649179
0.239162	487	100	0.240649	1	1.17096	11.176	0.642673
0.242347	425	105	0.228038	1	1.17241	10.17	0.634093
0.23461	401	100	0.234535	1	0.870247	11.0945	0.676686
0.225482	397	95	0.231061	1	0.860246	20.9645	0.595707
0.221543	383	110	0.216963	1	1.20183	10.211	0.614682
0.229448	344	105	0.205926	1	0.775641	11.1005	0.641426
0.238143	392	90	0.18708	1	1.21707	11.96	0.612628
0.227732	363	105	0.199685	1	0.722164	11.4925	0.728449
0.224827	442	105	0.17946	1	0.99894	29.421	0.671886
0.225508	541	80	0.13498	1	1.84245	20.399	0.683026
0.226038	663	105	0.130911	1	0.68012	20.476	0.556562
0.191682	641	80	0.138158	1	1.0125	12.909	0.579871
0.213526	506	80	0.158564	1	0.899996	10.15	0.518678
0.183219	529	126	0.120174	1	1.061	11.263	0.60168
0.160229	533	100	0.125979	1	0.859133	31.256	0.592811
0.197356	509	100	0.0987013	1	1.35331	18.632	0.75263
0.212616	564	105	0.1767	1	0.880282	35.4475	0.680774
0.22294	537	80	0.143881	1	0.816484	22.394	0.630934
0.204144	536	80	0.171585	1	1.23542	20.397	0.63026
0.234437	564	105	0.206154	1	0.949221	10.024	0.501189
0.173142	560	80	0.0714286	1	1.27212	12.4175	0.417212
0.14348	550	84	0.0734421	1	0.974645	9.4545	0.375977
0.120532	553	105	0.0905292	1	0.617143	10.1535	0.525432
0.191626	539	76	0.0480993	1	1.48778	10.832	0.389413
0.126008	536	76	0.1	1	0.709446	10.4475	0.386638
0.13136	510	100	0.0708723	1	1.842	9.3995	0.56988
0.206857	471	84	0.0603969	1	0.575255	12.9655	0.381825
0.129262	528	76	0.0819788	1	1.22846	8.9205	0.504444
0.18397	506	100	0.0594059	1	1.3198	10.1465	0.394337
0.130693	529	76	0.082535	1	0.650494	10.169	0.530184
0.195404	507	76	0.0514419	1	1.34914	10.415	0.437078
0.146592	550	105	0.0708092	1	1.17406	11.5855	0.313448
0.103268	558	80	0.0679348	1	0.459161	6.7145	0.452853
0.189052	517	68	0.00870253	1	1.15113	1.6815	0.530664
0.193422	546	95	0.0479134	1	1.58635	11.101	0.510982
0.187731	519	95	0.0488372	1	0.976816	10.232	0.595183
0.190865	529	68	0.0579065	1	0.937778	21.083	0.563922
0.174097	520	100	0.0809807	1	0.827478	21.8335	0.389103
0.12824	504	80	0.0856546	1	1.46458	10.3605	0.424259
0.147898	433	80	0.0641673	1	0.695696	10.6765	0.366461
0.119714	515	100	0.0825503	1	1.24549	9.4935	0.395736
0.128368	529	80	0.0785997	1	1.10214	11.359	0.334058
0.108863	514	76	0.0931923	1	0.694651	8.133	0.415107
0.138181	497	105	0.065816	1	0.920676	11.622	0.476822
0.130851	519	84	0.104396	1	1.44454	22.1855	0.417392
0.132007	613	85	0.0840075	1	1.03514	12.4425	0.54017
0.157939	530	120	0.0728477	1	1.19859	23.6545	0.482986
0.170217	539	72	0.0524747	1	0.723639	11.334	0.507844
0.181755	559	76	0.042648	1	1.70192	11.05	0.525565
0.189151	541	105	0.0430712	1	0.945404	11.5835	0.680336
0.178841	527	85	0.076484	1	0.722436	37.8935	0.482435
0.133628	572	95	0.0925137	1	1.29555	22.0065	0.491958
0.134851	532	100	0.0871824	1	0.761602	23.538	0.427084
0.141315	540	88	0.0683123	1	1.07086	12.055	0.367836
0.123341	452	76	0.0696749	1	0.873892	9.424	0.523627
0.152972	524	120	0.0755585	1	1.02899	22.7785	0.415463
0.14582	456	84	0.0556946	1	1.25959	9.666	0.564472
0.161908	523	180	0.130061	1	0.686975	25.106	0.438187
0.146852	524	100	0.0674578	1	1.06788	11.707	0.553768
0.20117	497	76	0.0423957	1	1.08402	12.427	0.530733
0.192602	539	95	0.0408669	1	0.858396	11.258	0.474391
0.176298	496	100	0.0395809	1	0.95384	8.845	0.562015
0.179898	514	95	0.0512666	1	1.25002	20.2235	0.507407
0.145472	481	76	0.0796857	1	0.746035	22.988	0.515325
0.191982	484	105	0.0367816	1	1.11552	9.7335	0.541343
0.163029	492	90	0.0599424	1	1.12522	22.9525	0.53984
0.19735	464	95	0.0452055	1	1.00005	11.96	0.488816
0.179129	461	126	0.041196	1	0.830186	10.146	0.458743
0.165719	506	80	0.0374766	1	1.1478	9.5425	0.452283
0.156548	504	76	0.0583333	1	1.44617	11.296	0.400477
0.13878	471	100	0.0518987	1	0.957586	9.4335	0.419942
0.146405	455	76	0.0562224	1	0.780814	10.3195	0.516575
0.186384	507	76	0.0418636	1	0.986499	11.606	0.51686
0.189058	459	100	0.0471014	1	0.908361	11.2535	0.44677
0.15236	472	76	0.0659341	1	1.3135	11.812	0.491702
0.181347	477	76	0.0502122	1	0.801658	9.5545	0.514493
0.185782	479	100	0.0466813	1	1.08493	11.7845	0.545453
0.202816	439	80	0.0507614	1	1.4193	11.3645	0.397922
0.138196	434	76	0.0600119	1	0.781636	9.489	0.53426
0.19604	449	100	0.0480183	1	0.794249	11.468	0.510173
0.181809	492	80	0.0675862	1	0.718449	11.8115	0.576196
0.182233	551	76	0.0713776	1	2.11733	21.159	0.511054
0.184359	539	100	0.0502513	1	0.818249	10.745	0.557295
0.20309	529	76	0.0502666	1	0.855847	11.9605	0.414535
0.13817	513	76	0.0659971	1	1.39843	11.3875	0.514614
0.155147	541	120	0.0668563	1	0.574345	20.693	0.417409
0.147308	485	80	0.0559593	1	1.96097	9.0425	0.58695
0.179824	562	342	0.222426	1	0.370943	20.3125	0.619336
0.180457	521	1144	0.472371	1	1.15906	20.323	0.651798
0.189511	524	1449	0.530911	1	1.75207	20.9165	0.61774
0.188193	494	100	0.389441	1	0.85811	20.0925	0.662322
0.190827	546	154	0.538462	1	0.905819	22.964	0.759257
0.248382	561	132	0.37601	1	0.917554	21.572	0.744651
0.247395	570	84	0.366088	1	1.35806	19.867	0.615657
0.225376	582	110	0.214566	1	0.959726	9.8945	0.634886
0.232703	579	84	0.263842	1	0.850669	9.8525	0.650259
0.238258	456	84	0.279232	1	1.39853	11.1415	0.663469
0.243244	405	110	0.249619	1	0.697561	12.5105	0.660854
0.217825	379	110	0.234404	1	0.992219	20.9845	0.708666
0.224545	429	88	0.25284	1	1.1891	25.668	0.627525
0.235379	391	110	0.221714	1	1.08009	10.3375	0.65166
0.210102	418	110	0.217	1	0.944443	22.033	0.704457
0.23029	428	84	0.183597	1	1.05972	23.6865	0.594206
0.216201	436	110	0.160777	1	0.934498	12.3235	0.649635
0.215658	467	132	0.186069	1	0.889449	20.2115	0.623026
0.234673	422	84	0.216114	1	0.996726	9.802	0.648661
0.238361	426	110	0.317183	1	0.977876	10.233	0.661336
0.2463	422	84	0.301038	1	0.790139	10.3495	0.639161
0.236451	429	84	0.239072	1	1.60034	11.198	0.641732
0.237002	400	110	0.234343	1	0.971866	11.945	0.78419
0.241717	411	110	0.284157	1	0.542255	30.7455	0.63711
0.235935	392	80	0.23134	1	1.81198	11.4775	0.616835
0.226874	391	110	0.236465	1	0.959775	10.9865	0.641851
0.242316	369	80	0.292125	1	1.04933	9.4565	0.600695
0.233408	368	80	0.265029	1	1.06182	6.492	0.740146
0.247391	388	126	0.346154	1	1.14286	21.4315	0.700004
0.24719	380	88	0.352231	1	1.30842	15.165	0.670657
0.243134	418	105	0.327389	1	0.950717	12.424	0.669395
0.248013	443	105	0.343995	1	0.731974	9.9665	0.675697
0.247971	461	100	0.335183	1	1.21334	10.9115	0.715523
0.237568	438	120	0.314391	1	0.508099	20.5415	0.670501
0.243253	618	110	0.330327	1	1.25774	10.2095	0.645407
0.23566	572	105	0.291749	1	0.721696	10.0145	0.668084
0.242279	534	100	0.2835	1	0.840786	11.708	0.667299
0.243017	524	105	0.267205	1	1.17096	11.4465	0.726855
0.243445	527	80	0.287924	1	1.3955	20.3925	0.783687
0.23842	544	100	0.271949	1	0.898759	30.713	0.631889
0.232501	610	105	0.204972	1	1.24498	10.1435	0.617055
0.226055	620	76	0.18048	1	0.769	10.05	0.577196
0.205076	528	84	0.181361	1	1.2256	12.093	0.627504
0.227502	476	126	0.18803	1	0.858811	12.545	0.644522
0.220685	384	80	0.200778	1	0.977943	18.377	0.67999
0.207602	377	120	0.221936	1	1.17242	27.5775	0.71623
0.232102	404	105	0.262136	1	1.33786	24.1385	0.713869
0.238322	398	110	0.260213	1	0.584809	21.378	0.628984
0.235774	378	80	0.262561	1	0.945895	9.7925	0.636595
0.238645	407	105	0.266562	1	1.35364	9.838	0.648399
0.242325	404	80	0.229816	1	0.987727	11.596	0.641873
0.232617	502	80	0.22252	1	1.49109	12.1765	0.528493
0.190245	518	115	0.194546	1	0.691059	8.9995	0.626883
0.228774	554	84	0.18899	1	0.845389	11.2985	0.656073
0.242598	554	80	0.283339	1	1.21411	9.776	0.631044
0.228703	534	105	0.260517	1	0.963623	10.8825	0.649372
0.235621	516	80	0.257465	1	1.34704	11.717	0.66397
0.242374	518	80	0.323443	1	0.754558	10.4135	0.658644
0.243666	548	105	0.312678	1	0.812497	9.4305	0.654618
0.243115	552	80	0.307648	1	1.06763	8.5865	0.651718
0.237761	553	80	0.272635	1	0.867993	10.5635	0.686181
0.246646	568	110	0.312572	1	1.11222	12.227	0.606937
0.221052	587	100	0.204422	1	1.02764	10.5065	0.251983
0.086762	541	68	0.0546601	1	0.835285	3.0255	0.499424
0.192068	552	100	0.0314788	1	1.02229	6.945	0.5145
0.188075	538	100	0.0426136	1	1.26874	10.6375	0.510936
0.183036	572	76	0.0487622	1	1.2501	11.0095	0.630961
0.201433	521	100	0.0589849	1	0.840695	23.09	0.481753
0.132324	555	76	0.111035	1	0.51343	22.1945	0.458662
0.157157	583	76	0.0629115	1	1.49695	11.253	0.413638
0.143292	553	100	0.0572626	1	1.51326	9.366	0.369436
0.117262	550	76	0.0961668	1	0.778851	10.244	0.360494
0.112606	539	80	0.107483	1	1.27577	10.4085	0.374068
0.12022	474	100	0.0911017	1	1.2499	11.1425	0.462034
0.126426	496	84	0.120678	1	0.598381	21.526	0.387615
0.120408	529	95	0.0969739	1	1.08482	11.8575	0.47844
0.165719	514	100	0.0624576	1	0.898593	12.2015	0.572992
0.184932	508	110	0.0624598	1	1.38116	20.596	0.460742
0.162268	484	80	0.0644491	1	0.785404	10.9905	0.407124
0.136524	554	100	0.0709723	1	1.06053	9.681	0.668721
0.188321	529	95	0.0789474	1	1.07526	33.038	0.503419
0.147177	509	95	0.0895317	1	1.1626	21.4415	0.499313
0.146037	529	100	0.0889488	1	0.996677	20.998	0.418271
0.138175	503	80	0.0713351	1	0.910342	11.867	0.506886
0.148622	484	68	0.0765931	1	1.00543	22.272	0.434345
0.12395	524	120	0.0816195	1	0.808636	18.33	0.536293
0.190811	542	90	0.0463883	1	1.04677	12.7125	0.583687
0.17982	467	180	0.10418	1	1.15164	22.879	0.407433
0.125489	503	100	0.0881789	1	0.824783	14.1135	0.551982
0.200794	455	80	0.0473186	1	1.09096	12.723	0.506791
0.185376	452	76	0.0436338	1	0.890764	10.8885	0.421067
0.146221	455	100	0.0685714	1	1.14446	9.9515	0.477489
0.178947	461	76	0.0522778	1	1.16173	8.7025	0.668624
0.193703	420	95	0.0750361	1	1.14797	32.5505	0.416
0.140575	453	105	0.0790541	1	0.923028	10.8635	0.58293
0.174539	494	100	0.0690131	1	1.0713	24.8895	0.495357
0.180027	474	95	0.0449275	1	0.554534	11.1545	0.503596
0.184	513	100	0.0455192	1	1.56147	10.175	0.485471
0.17606	501	100	0.0435393	1	0.743418	10.238	0.51051
0.187862	439	68	0.0423787	1	1.31602	10.542	0.488652
0.178962	497	100	0.0390371	1	1.37847	9.9135	0.451322
0.164386	485	80	0.0403497	1	0.565556	9.1595	0.436765
0.151489	507	76	0.0589795	1	1.04957	10.694	0.499849
0.181398	461	110	0.0386179	1	0.930261	10.9305	0.438082
0.150652	491	76	0.0721649	1	1.21991	11.129	0.522241
0.18745	514	76	0.0570236	1	0.900823	11.7845	0.469405
0.167655	552	100	0.0495334	1	1.82258	9.8525	0.519433
0.189583	496	80	0.0486322	1	0.536606	10.735	0.531445
0.194741	499	76	0.0528634	1	1.22478	11.2315	0.476225
0.170994	509	100	0.0428135	1	0.906406	10.3695	0.529958
0.191432	493	76	0.0489978	1	0.852265	11.9505	0.492878
0.171505	522	76	0.082542	1	1.29441	11.8615	0.601062
0.194611	471	100	0.0766341	1	0.887599	21.572	0.486993
0.176663	524	100	0.0473164	1	0.651716	9.829	0.483692
0.17731	527	76	0.0471771	1	1.81461	9.2955	0.421294
0.145034	517	100	0.054494	1	1.04923	10.2075	0.490904
0.149968	509	95	0.0627154	1	0.693266	19.3635	0.57545
0.182285	530	160	0.0878084	1	1.30883	20.632	0.574686
0.176957	515	336	0.186834	1	0.929512	20.447	0.647634
0.183603	532	1680	0.573607	1	0.845628	20.957	0.668847
0.192568	505	840	0.638834	1	0.784479	21.456	0.666839
0.201859	554	154	0.492718	1	1.00177	20.6755	0.668624
0.24041	533	84	0.258333	1	1.02721	12.7525	0.702262
0.249152	524	105	0.496665	1	1.82482	10.962	0.747813
0.246511	515	110	0.457137	1	0.918512	19.805	0.654073
0.23856	454	88	0.304073	1	0.71296	11.1995	0.658436
0.241669	488	84	0.375541	1	1.17819	9.167	0.687088
0.246766	449	110	0.338819	1	1.14986	12.8295	0.662786
0.241666	488	84	0.301994	1	1.14776	11.5245	0.690719
0.228324	444	105	0.27114	1	0.477165	20.9795	0.716377
0.231784	494	110	0.27233	1	1.3237	23.0225	0.636037
0.234341	482	88	0.266912	1	0.920012	10.1015	0.829515
0.241261	495	115	0.336029	1	1.16919	36.042	0.654995
0.236881	480	110	0.32	1	1.45409	11.266	0.698986
0.230848	509	88	0.265904	1	0.889055	20.7105	0.636694
0.234827	494	105	0.276436	1	0.940619	9.979	0.645937
0.242333	412	110	0.252325	1	1.27483	10.335	0.635076
0.238659	451	110	0.211598	1	0.953614	9.889	0.649405
0.236673	486	84	0.340048	1	0.762821	10.196	0.654839
0.238484	467	110	0.317812	1	0.763876	11.024	0.823838
0.243817	551	105	0.380428	1	1.0852	33.146	0.678913
0.246516	559	80	0.386116	1	1.28334	9.885	0.670891
0.242292	496	105	0.337434	1	0.927609	11.546	0.660574
0.237719	527	80	0.343588	1	0.841018	11.002	0.657125
0.242898	471	84	0.378442	1	1.13529	8.8615	0.712295
0.241131	488	126	0.377563	1	1.55591	17.449	0.703401
0.249101	489	80	0.40285	1	0.696487	13.2675	0.693838
0.240682	526	80	0.400788	1	1.04213	14.109	0.699564
0.248821	511	100	0.405128	1	1.12758	12.7155	0.676199
0.247346	514	84	0.381279	1	1.04654	9.7625	0.678667
0.247085	469	100	0.358776	1	1.09949	11.022	0.733636
0.234702	562	126	0.330581	1	0.888589	22.854	0.65527
0.240415	531	84	0.344079	1	0.796715	9.5105	0.655497
0.237703	544	110	0.31864	1	1.10573	10.5055	0.670822
0.244433	521	95	0.289375	1	0.882554	11.492	0.670979
0.239351	513	80	0.320285	1	1.12428	12.5085	0.726742
0.24058	527	80	0.279371	1	0.862528	21.5585	0.765731
0.222044	529	126	0.309813	1	1.17664	32.646	0.695254
0.231123	534	88	0.2	1	0.975041	21.08	0.602618
0.215918	607	80	0.161189	1	0.857454	11.7665	0.561034
0.195244	596	105	0.194245	1	1.06897	11.77	0.600587
0.216245	602	105	0.118607	1	0.800904	11.906	0.653764
0.222655	554	80	0.193728	1	1.4488	17.5085	0.698813
0.210056	564	147	0.19027	1	0.797016	28.3635	0.742694
0.229495	549	76	0.245179	1	0.869717	27.755	0.78146
0.224	524	100	0.28104	1	1.32555	34.488	0.630129
0.230015	541	95	0.288093	1	0.953907	9.8515	0.658264
0.242464	559	80	0.291383	1	1.09026	10.049	0.675308
0.246299	547	80	0.341446	1	0.892167	10.6955	0.667376
0.241358	530	110	0.342025	1	0.871795	10.6255	0.61909
0.229899	533	110	0.246084	1	0.900643	8.9245	0.627391
0.223004	533	80	0.28076	1	0.64235	11.861	0.665683
0.245302	476	105	0.34668	1	2.7757	9.9345	0.621734
0.225994	450	105	0.267056	1	0.845203	10.9925	0.644492
0.2363	456	80	0.241967	1	0.681201	11.7455	0.676795
0.246814	450	105	0.317163	1	1.11445	11.82	0.40359
0.139334	494	76	0.0734694	1	1.20606	9.5295	0.388214
0.134324	440	76	0.056872	1	0.745113	9.243	0.465527
0.163917	518	100	0.0612245	1	1.54163	10.653	0.557568
0.202762	539	80	0.041977	1	1.20877	12.093	0.375882
0.123906	529	95	0.0786441	1	0.791787	9.843	0.281339
0.104227	475	100	0.0300401	1	1.1386	3.062	0.504879
0.192326	511	76	0.034386	1	0.740432	8.165	0.526219
0.190589	552	95	0.0448766	1	0.96541	11.185	0.521421
0.186902	602	100	0.0471766	1	1.17648	10.979	0.610515
0.189814	593	80	0.0593729	1	1.03922	23.1125	0.513107
0.140476	672	88	0.111486	1	0.809008	23.352	0.484363
0.170273	639	100	0.0453278	1	0.942655	10.582	0.361877
0.114	671	76	0.089857	1	0.780343	8.953	0.411904
0.130671	666	76	0.0837304	1	0.713176	11.193	0.361774
0.118221	675	100	0.0776978	1	1.71027	8.2365	0.399088
0.122791	678	80	0.0922659	1	1.59796	12.0265	0.487011
0.132401	579	84	0.0940877	1	0.882729	22.8855	0.456264
0.155162	500	120	0.0627861	1	1.04427	11.777	0.430094
0.141841	556	80	0.078	1	0.837817	12.035	0.553399
0.161317	550	95	0.0761246	1	1.36766	24.4115	0.433978
0.144811	547	105	0.0817694	1	0.842626	11.502	0.417799
0.144945	546	80	0.0500329	1	0.902836	9.1875	0.588413
0.1831	564	95	0.0722812	1	1.44837	22.466	0.500062
0.145569	498	120	0.0812954	1	0.814027	21.5665	0.465359
0.136885	490	95	0.0795165	1	0.98274	19.483	0.483941
0.142149	478	76	0.0764855	1	0.92207	20.7215	0.49146
0.14037	511	100	0.0824551	1	0.989355	22.129	0.587765
0.160539	491	95	0.0698254	1	0.918974	30.204	0.423689
0.139145	494	72	0.07201	1	1.15389	12.534	0.508141
0.142482	481	189	0.136582	1	1.0999	22.9595	0.405852
0.131302	470	76	0.069522	1	0.903743	12.781	0.510577
0.17911	473	76	0.0589404	1	1.17003	12.9455	0.519392
0.190425	452	100	0.0435384	1	1.00034	11.118	0.496723
0.184926	434	90	0.043956	1	0.727846	9.5945	0.471187
0.177909	431	72	0.0494269	1	1.32492	8.4645	0.571081
0.180198	501	114	0.0609511	1	0.669498	21.4305	0.491315
0.142663	531	95	0.0856963	1	1.54038	20.7435	0.579341
0.17761	573	100	0.0613536	1	0.763163	22.712	0.490179
0.173489	557	120	0.0447458	1	0.866526	11.616	0.493539
0.181068	522	76	0.0439259	1	0.982017	9.5385	0.492902
0.177914	521	100	0.0414684	1	1.36269	10.4095	0.485421
0.173119	520	100	0.0483871	1	0.737662	10.633	0.421065
0.145814	522	76	0.0569878	1	1.4121	10.086	0.434946
0.155256	504	76	0.0503235	1	0.69318	9.343	0.425471
0.146098	537	100	0.0619718	1	1.2365	10.239	0.511893
0.18469	538	80	0.0395284	1	1.03101	10.897	0.506722
0.179795	537	76	0.0571625	1	0.846775	11.696	0.4875
0.168709	591	100	0.0649606	1	0.80282	11.6155	0.492487
0.178192	546	76	0.0460763	1	1.68354	10.1915	0.487046
0.176747	576	80	0.0433526	1	1.20737	9.41	0.55041
0.201365	519	100	0.0508596	1	0.671921	11.6395	0.433298
0.150036	475	76	0.0556946	1	0.869677	10.733	0.505886
0.181112	494	76	0.0509506	1	1.4105	11.6895	0.503499
0.177548	487	100	0.0782484	1	0.984906	11.973	0.601712
0.189624	484	76	0.0713246	1	1.1481	23.236	0.442684
0.152942	470	95	0.0660981	1	0.754628	11.064	0.504011
0.180353	477	100	0.0543785	1	0.902193	11.767	0.433411
0.149908	470	80	0.0524523	1	0.609464	11.059	0.515217
0.163028	493	95	0.0583573	1	1.94303	18.9295	0.543386
0.172476	540	189	0.0898161	1	0.759792	18.728	0.522943
0.161122	492	300	0.19666	1	1.79225	17.907	0.606959
0.164034	482	2760	0.703896	1	0.694879	18.4755	0.596291
0.174443	513	154	0.557682	1	1.29285	18.283	0.640801
0.237579	502	84	0.241327	1	0.855083	10.121	0.667326
0.242416	486	84	0.208073	1	0.483027	13.401	0.676298
0.24678	487	105	0.357199	1	1.51884	10.7505	0.738982
0.242824	535	84	0.333183	1	1.28555	21.5835	0.624726
0.230301	509	84	0.229462	1	1.21528	10.1295	0.641004
0.236786	544	110	0.260685	1	0.882758	9.6125	0.669187
0.240838	520	88	0.251497	1	0.734998	12.953	0.655716
0.240927	538	84	0.241061	1	1.0528	11.263	0.662941
0.211581	531	132	0.214349	1	1.08874	22.186	0.682995
0.216129	503	84	0.209787	1	1.03168	24.122	0.60471
0.223027	524	84	0.161542	1	1.09332	10.5605	0.772047
0.221838	540	132	0.193534	1	1.46301	35.728	0.64396
0.236372	562	80	0.165	1	0.725228	11.7165	0.689195
0.226873	553	88	0.157356	1	0.586392	21.984	0.598725
0.221397	562	110	0.155794	1	1.43166	9.979	0.565331
0.209355	555	88	0.117062	1	0.985852	9.774	0.640264
0.233605	605	105	0.251598	1	0.994428	10.093	0.657845
0.245629	554	110	0.246183	1	0.823127	9.556	0.638524
0.233367	546	88	0.204416	1	0.793008	11.3145	0.809456
0.237325	551	105	0.224132	1	1.38514	35.822	0.661735
0.245532	509	110	0.288806	1	1.10006	9.937	0.643837
0.236251	498	84	0.209164	1	1.02342	11.7085	0.641999
0.23274	520	72	0.26732	1	0.669611	11.2325	0.669908
0.245857	552	105	0.322665	1	1.27009	9.944	0.67617
0.235509	497	100	0.286182	1	1.45811	15.4205	0.686
0.249028	482	88	0.322976	1	1.15274	12.2565	0.698092
0.246174	464	110	0.315802	1	0.691755	14.93	0.669474
0.240381	521	100	0.29243	1	1.14149	12.611	0.661755
0.247092	421	80	0.314538	1	1.10549	9.942	0.670016
0.247474	459	105	0.298445	1	0.755268	10.9605	0.643211
0.237147	500	105	0.26728	1	0.882765	10.1305	0.709079
0.240659	463	100	0.295316	1	1.85003	18.989	0.634409
0.238254	478	115	0.244163	1	0.686258	9.084	0.664302
0.242826	501	95	0.255858	1	1.47616	11.866	0.667601
0.245621	475	80	0.234653	1	0.597681	11.915	0.649643
0.245141	400	105	0.241027	1	1.15563	10.332	0.800735
0.240284	384	100	0.261359	1	0.99626	34.419	0.693901
0.230003	454	80	0.184678	1	0.726281	22.212	0.600274
0.221692	466	105	0.165683	1	1.07509	10.7665	0.606886
0.220979	494	80	0.174861	1	1.33512	11.9545	0.595083
0.214738	486	100	0.181062	1	0.944762	11.962	0.664512
0.21976	418	105	0.202634	1	1.00257	21.1735	0.628322
0.179609	492	108	0.0815671	1	0.746361	30.007	0.647366
0.208096	499	80	0.188253	1	1.34308	21.9435	0.724792
0.214025	506	105	0.216228	1	1.01804	30.9335	0.675471
0.224509	527	80	0.225306	1	1.18765	19.8125	0.624376
0.233091	518	80	0.204744	1	1.06465	9.4735	0.641419
0.239778	494	105	0.215243	1	0.913116	10.308	0.6501
0.239698	464	80	0.199477	1	1.01229	12.116	0.551407
0.203814	493	100	0.164254	1	1.28369	9.111	0.575185
0.210422	436	110	0.189138	1	1.00185	10.5465	0.636594
0.238264	379	80	0.188997	1	0.818691	11.6695	0.580938
0.217399	385	100	0.213663	1	0.943011	9.3525	0.572114
0.208176	390	105	0.17748	1	1.05591	11.807	0.646742
0.240025	386	84	0.201082	1	0.756251	12.0505	0.640169
0.237301	392	80	0.298045	1	1.08622	10.333	0.650293
0.245548	376	105	0.305366	1	0.9895	9.203	0.632141
0.236468	374	80	0.277263	1	1.10919	10.0675	0.648537
0.242387	381	80	0.272468	1	1.10454	10.3135	0.657342
0.243821	366	110	0.294359	1	0.891616	11.26	0.598771
0.230939	370	80	0.247178	1	0.991232	7.2385	0.594105
0.247679	365	76	0.294118	1	0.836518	0.275	0.632724
0.246867	382	105	0.241873	1	0.869687	7.055	0.508375
0.1891	347	95	0.0479183	1	0.836575	11.3265	0.50724
0.186848	395	76	0.0500795	1	1.3825	11.01	0.608304
0.196233	408	100	0.0610909	1	1.0759	22.8295	0.50415
0.14542	489	80	0.0914052	1	0.918088	22.0295	0.448696
0.155015	523	76	0.0637681	1	0.941224	11.1245	0.433822
0.152223	527	100	0.0544313	1	1.10285	9.7705	0.398193
0.133928	497	76	0.0794176	1	0.682567	10.2085	0.352861
0.107966	525	76	0.11359	1	1.66551	10.785	0.347205
0.111568	533	100	0.0890411	1	0.719224	9.14	0.514711
0.143149	533	84	0.0896921	1	1.50146	24.0805	0.445167
0.162936	430	115	0.0518713	1	1.05466	9.0195	0.446168
0.154526	454	100	0.0601942	1	0.825122	11.3735	0.521638
0.159678	462	100	0.071191	1	1.12115	21.105	0.486761
0.176716	450	80	0.0522918	1	1.05213	10.6365	0.397535
0.138058	478	100	0.055873	1	0.66388	9.4195	0.446819
0.170925	451	80	0.0314304	1	1.68747	6.633	0.690863
0.183461	483	95	0.0851613	1	0.943236	38.4385	0.455041
0.157384	515	120	0.0607542	1	0.790543	11.1065	0.494517
0.139574	476	114	0.0890603	1	0.831717	23.024	0.47997
0.129654	466	76	0.107473	1	1.23821	23.6195	0.500496
0.13812	443	100	0.0924541	1	1.00055	24.739	0.560219
0.146011	471	95	0.0898876	1	1.25662	30.694	0.53259
0.148913	450	76	0.0971349	1	0.582076	25.72	0.607368
0.151478	400	198	0.15302	1	0.897412	35.5815	0.39528
0.125989	467	76	0.0848033	1	1.75577	12.6435	0.407224
0.1256	539	76	0.106476	1	0.732009	13.2005	0.42301
0.142854	528	100	0.0572308	1	1.17148	11.0045	0.46409
0.165681	561	100	0.0503461	1	1.07234	9.6405	0.479149
0.177588	555	48	0.0491228	1	0.906464	8.4615	0.595786
0.194506	535	120	0.0586572	1	1.01231	20	0.501587
0.139327	555	95	0.0946866	1	1.10339	22.9515	0.522382
0.187081	537	100	0.0502409	1	0.78029	11.74	0.55958
0.165447	538	95	0.0640669	1	1.14493	24.679	0.516023
0.188952	523	95	0.0443828	1	0.873494	10.2015	0.487202
0.175191	558	100	0.0447214	1	0.974057	10.047	0.465885
0.167564	523	100	0.0455446	1	1.10825	9.704	0.398339
0.134712	450	76	0.0640946	1	1.31316	10.7105	0.424279
0.152654	433	76	0.047973	1	0.738723	9.0265	0.418452
0.147477	399	100	0.0595075	1	0.725077	10.3345	0.501407
0.18469	425	80	0.0384356	1	1.05109	10.788	0.456741
0.162146	452	76	0.0540906	1	1.24241	10.93	0.522091
0.18454	440	100	0.0647249	1	0.776614	13.138	0.464736
0.170231	434	76	0.0434783	1	1.70531	9.538	0.496571
0.181861	431	76	0.0418814	1	0.691111	10.708	0.543779
0.202595	441	105	0.0441576	1	1.15918	11.309	0.361742
0.125207	461	76	0.0605889	1	0.816968	8.0845	0.506305
0.185487	455	76	0.0408701	1	1.07556	10.827	0.577456
0.211867	457	100	0.0562029	1	0.625549	12.685	0.580625
0.192164	438	76	0.0655419	1	1.899	19.808	0.50759
0.188958	391	95	0.0420168	1	1.39324	10.479	0.547541
0.204538	370	100	0.0482655	1	0.885886	11.738	0.469039
0.170245	396	80	0.042011	1	1.11372	10.6865	0.503111
0.154363	421	95	0.0652778	1	1.03612	20.4855	0.449859
0.165019	429	95	0.0441075	1	0.83729	9.13	0.569133
0.176935	432	380	0.210558	1	0.613998	20.1115	0.590518
0.170445	444	1000	0.4479	1	1.14656	20.4595	0.651152
0.192574	500	1584	0.564277	1	1.15305	19.34	0.661941
0.202947	543	120	0.484386	1	1.21899	19.796	0.668486
0.241593	534	84	0.2509	1	0.695974	12.666	0.657904
0.244309	516	110	0.257815	1	1.21069	10.1555	0.740281
0.242935	490	84	0.273454	1	1.16608	23.183	0.634186
0.236245	503	84	0.212837	1	0.680393	9.9985	0.640468
0.240797	493	110	0.248708	1	1.20051	9.1895	0.669933
0.246312	515	92	0.260308	1	0.916312	11.2165	0.664861
0.243654	525	84	0.220774	1	1.0339	11.8935	0.67358
0.230875	500	132	0.16523	1	1.05867	18.6785	0.674808
0.222922	529	84	0.182956	1	0.890667	21.224	0.598624
0.215884	538	84	0.164032	1	0.999331	11.76	0.71706
0.232579	559	132	0.171851	1	0.995675	24.0745	0.719491
0.236545	554	88	0.181183	1	0.715405	22.789	0.608764
0.219101	572	88	0.171859	1	1.82734	11.8355	0.704479
0.235021	527	100	0.16482	1	0.746656	21.8355	0.619472
0.235623	557	88	0.152742	1	0.928794	8.777	0.629296
0.231332	605	84	0.171276	1	1.38347	10.513	0.640018
0.238152	566	110	0.221431	1	0.960578	9.7075	0.614822
0.222978	579	88	0.19177	1	1.13441	11.028	0.620552
0.220629	551	84	0.202868	1	1.04702	12.974	0.819923
0.24431	522	132	0.306156	1	0.783609	33.826	0.649074
0.243634	432	84	0.273077	1	1.19181	9.6935	0.622338
0.226041	414	80	0.245458	1	0.640718	11.8545	0.637314
0.241891	417	105	0.25595	1	1.28631	9.037	0.61775
0.233083	418	80	0.253184	1	1.10287	8.672	0.717469
0.241296	390	100	0.295921	1	0.990034	20.861	0.693083
0.249338	436	105	0.305895	1	0.98064	13.8075	0.673648
0.237897	513	84	0.30965	1	1.11391	13.9145	0.668722
0.247642	442	100	0.304677	1	1.12469	10.4615	0.659202
0.2453	453	105	0.26735	1	0.888369	10.611	0.658997
0.243354	451	105	0.292422	1	0.84202	10.6415	0.6902
0.232957	439	100	0.251513	1	0.864923	19.8325	0.640669
0.236457	478	110	0.275648	1	0.972677	10.076	0.657191
0.242538	518	105	0.240679	1	0.932401	11.0375	0.656951
0.24493	481	100	0.237849	1	0.961601	10.269	0.650994
0.241449	567	105	0.193706	1	1.06498	10.679	0.8212
0.240214	536	100	0.24178	1	0.975219	36.4285	0.707243
0.237236	534	76	0.212344	1	1.19951	20.7085	0.725318
0.236398	681	95	0.183997	1	0.874378	22.328	0.601426
0.216813	596	80	0.171846	1	1.37555	11.4025	0.588447
0.216655	532	80	0.165496	1	0.742911	10.0725	0.611045
0.222299	462	126	0.162921	1	0.84164	12.5985	0.799085
0.214959	509	126	0.191499	1	1.69184	42.3465	0.574515
0.21658	486	84	0.144324	1	0.963807	8.9315	0.634394
0.203716	435	105	0.178788	1	0.736188	21.859	0.71669
0.208842	475	80	0.174298	1	1.23761	32.7475	0.64618
0.215372	454	80	0.189408	1	0.908095	19.577	0.652611
0.221242	402	105	0.119462	1	0.787251	20.613	0.710981
0.239422	433	80	0.204076	1	1.7704	21.525	0.652707
0.245001	439	84	0.203478	1	0.708661	10.9225	0.577512
0.214927	432	115	0.186851	1	1.09825	9.4955	0.648347
0.243429	422	80	0.214992	1	0.85535	10.814	0.649418
0.245755	414	80	0.237263	1	0.981195	9.7695	0.581186
0.215394	426	105	0.174653	1	0.930161	10.5915	0.610575
0.226741	431	84	0.150037	1	1.18254	11.5235	0.651572
0.245739	428	80	0.221434	1	1.0636	10.3405	0.634879
0.235643	481	105	0.261704	1	1.00046	9.6045	0.642322
0.241527	501	80	0.265286	1	0.910358	8.7215	0.634646
0.234021	495	80	0.24357	1	0.791392	10.403	0.644419
0.246311	403	95	0.252931	1	1.00269	9.011	0.462654
0.193378	194	88	0.0423892	1	1.66582	4.293	0.566257
0.181535	523	100	0.0566908	1	1.23418	20.1685	0.557895
0.17477	530	80	0.0647572	1	0.793578	20.782	0.420468
0.143884	516	76	0.064557	1	0.988799	10.5	0.409558
0.135479	550	95	0.0734908	1	1.33154	10.9135	0.374472
0.125284	523	76	0.069471	1	0.85078	9.292	0.385689
0.125227	525	76	0.0797703	1	0.79214	10.771	0.366777
0.115764	548	100	0.0961783	1	1.08279	10.554	0.471415
0.123786	527	84	0.0984394	1	1.02976	23.715	0.370827
0.121871	457	100	0.0879479	1	0.632215	10.1195	0.459426
0.154618	457	100	0.0710963	1	1.58783	13.2185	0.529416
0.167825	436	100	0.0670651	1	0.944872	20.1075	0.450061
0.158594	436	80	0.0645161	1	1.25345	10.641	0.448651
0.158333	429	100	0.0573879	1	0.876942	10.938	0.473358
0.175323	439	80	0.0490262	1	0.694913	9.181	0.633304
0.175312	428	95	0.0838881	1	1.25591	33.1245	0.476723
0.139263	435	120	0.0855043	1	0.86097	20.62	0.500704
0.148867	452	95	0.0848401	1	1.2307	21.175	0.535847
0.160765	564	76	0.0638158	1	0.93456	21.7075	0.39026
0.122299	594	100	0.0868762	1	1.37631	11.737	0.520324
0.148905	582	95	0.0718301	1	0.806259	22.8555	0.411641
0.137092	580	76	0.0652312	1	1.13787	10.559	0.574145
0.167597	579	189	0.108684	1	1.0115	24.316	0.39226
0.12491	485	80	0.0778275	1	0.920852	12.434	0.412081
0.132724	481	80	0.0868298	1	0.955191	12.455	0.468413
0.167448	428	100	0.0503505	1	0.933226	11.0935	0.496622
0.184916	427	100	0.045738	1	0.939963	9.749	0.546925
0.180235	416	95	0.0576247	1	0.84866	19.079	0.581528
0.18511	419	100	0.055794	1	1.00954	22.189	0.391073
0.132843	414	100	0.0795215	1	0.810426	10.1645	0.531982
0.161158	475	95	0.0772171	1	1.35808	21.788	0.524832
0.191771	413	120	0.0481928	1	1.15872	12.2575	0.523437
0.192548	473	76	0.0509653	1	0.837526	10.556	0.442464
0.160606	476	100	0.0430839	1	0.85653	9.021	0.402425
0.134629	471	100	0.0832095	1	0.807195	10.679	0.365941
0.12455	449	72	0.0749646	1	1.47544	8.994	0.458257
0.165095	461	76	0.0508083	1	0.952207	9.791	0.45962
0.160887	453	100	0.0593773	1	1.26012	11.546	0.506968
0.185705	457	80	0.0394831	1	0.883149	10.8795	0.470347
0.169643	484	76	0.0548697	1	1.42867	10.2325	0.482446
0.168109	506	100	0.0660131	1	0.814763	11.684	0.476944
0.172159	550	76	0.0428371	1	0.896915	9.6275	0.541179
0.196561	534	80	0.0465773	1	0.898832	11.582	0.510483
0.188697	498	100	0.0493827	1	0.829786	10.2305	0.49623
0.186664	521	76	0.0358974	1	1.18098	8.2595	0.442063
0.142973	605	76	0.071883	1	0.867713	12.6845	0.580607
0.211621	596	90	0.0567624	1	1.05471	11.734	0.600667
0.191022	560	76	0.0699926	1	0.747562	22.0045	0.503742
0.183675	540	95	0.0458015	1	1.6019	10.0395	0.532627
0.191246	518	100	0.05081	1	0.632939	12.2045	0.472321
0.168293	532	80	0.0436681	1	1.07344	10.307	0.47134
0.132548	507	95	0.085277	1	1.64424	21.488	0.540961
0.173444	379	189	0.0750332	1	0.963339	20.087	0.516594
0.157239	409	375	0.167055	1	1.08705	19.6355	0.580478
0.165319	440	1617	0.503586	1	0.730828	19.058	0.605483
0.174174	419	968	0.558433	1	1.05011	20.0185	0.600639
0.182885	433	126	0.415227	1	1.16817	19.37	0.649213
0.237905	417	84	0.234624	1	1.02204	12.3695	0.672732
0.24777	421	110	0.356688	1	1.36271	10.481	0.73425
0.246239	442	84	0.34462	1	0.722538	20.4635	0.612372
0.228843	457	84	0.23451	1	1.09796	9.2945	0.646241
0.240637	461	110	0.274485	1	0.978554	9.974	0.647047
0.236092	424	88	0.267633	1	1.04252	11.7355	0.659837
0.242004	473	80	0.23074	1	0.740033	12.1045	0.658248
0.217556	527	132	0.200835	1	1.05705	19.8535	0.659099
0.210744	570	84	0.204102	1	1.28652	21.9865	0.604948
0.219823	531	84	0.200495	1	0.609589	10.8365	0.708952
0.227096	578	132	0.207977	1	0.781252	23.707	0.698821
0.222865	605	88	0.200721	1	1.41486	23.2755	0.642282
0.229731	583	88	0.206833	1	0.891924	12.809	0.677796
0.212583	524	110	0.189894	1	1.36125	24.702	0.606171
0.229941	475	88	0.200359	1	0.952384	8.515	0.63888
0.236058	478	84	0.226994	1	1.12099	10.7025	0.615296
0.230532	486	110	0.197285	1	0.863816	9.7155	0.599015
0.218191	497	88	0.187091	1	1.05542	11.17	0.634404
0.229851	492	80	0.215094	1	0.871518	12.489	0.828085
0.24452	473	126	0.296136	1	1.42849	35.681	0.652654
0.242442	486	80	0.241416	1	0.804007	10.568	0.576593
0.208665	494	80	0.211013	1	0.880775	10.3385	0.648365
0.242767	518	105	0.223892	1	1.08011	9.992	0.613767
0.229965	545	80	0.252943	1	1.5711	7.831	0.741658
0.243644	586	125	0.302956	1	0.998925	21.5465	0.706931
0.24925	567	100	0.264984	1	0.630346	15.1715	0.661173
0.231921	592	100	0.281745	1	1.39654	13.6595	0.664309
0.245221	564	84	0.262204	1	0.893661	10.318	0.680843
0.247178	556	105	0.295984	1	0.956396	11.6775	0.653818
0.240936	519	105	0.287437	1	1.06687	9.8965	0.692915
0.237372	458	100	0.286936	1	1.18931	17.9945	0.624497
0.231094	454	110	0.265882	1	0.761015	9.9155	0.634612
0.231594	478	105	0.251183	1	1.66354	11.25	0.672643
0.244291	459	80	0.228178	1	0.628272	13.2455	0.654392
0.244415	458	105	0.235058	1	0.94328	10.671	0.788747
0.232045	463	100	0.250199	1	1.38851	34.8855	0.698295
0.228183	463	80	0.218133	1	0.528111	22.884	0.618351
0.230288	604	105	0.14414	1	1.13415	9.469	0.620756
0.22462	597	80	0.154398	1	1.00957	12.0455	0.554177
0.195796	573	80	0.183616	1	0.719833	11.079	0.591554
0.217909	520	126	0.1136	1	0.902275	11.2975	0.687092
0.209421	461	95	0.151669	1	1.65141	28.232	0.672541
0.226123	475	100	0.175704	1	1.15513	20.2755	0.667936
0.206037	485	105	0.209504	1	0.908431	25.2875	0.75171
0.208678	479	80	0.22296	1	0.560429	37.13	0.683795
0.22269	451	80	0.199814	1	1.62265	22.703	0.663549
0.21939	371	105	0.163724	1	1.10639	22.4125	0.649074
0.24121	392	80	0.186417	1	0.878686	12.4205	0.600503
0.224451	438	88	0.176166	1	1.28133	10.2625	0.557441
0.208751	400	110	0.157854	1	0.875649	9.24	0.598294
0.218515	440	80	0.165992	1	0.939083	11.973	0.632096
0.238725	413	80	0.213916	1	0.120026	9.923	0.512474
